# Supplementary material
Source: PubMed Central journal article supplement (PMC5752382)

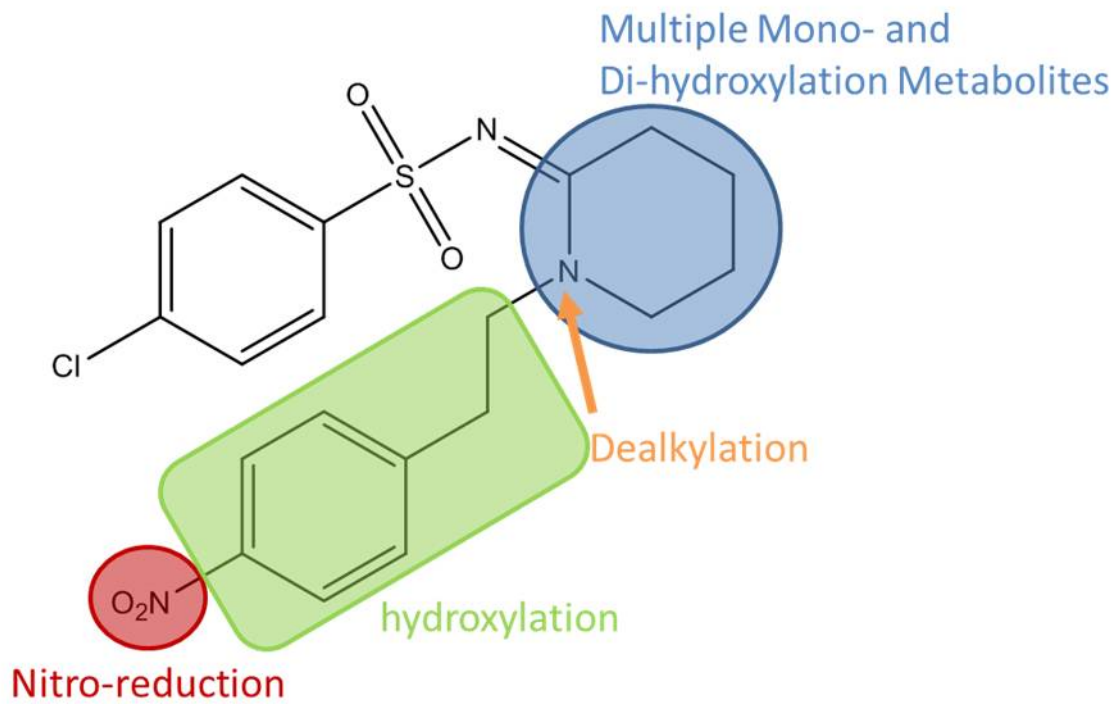

**Supplemental Figure 1. Potential sites of W-18 metabolism**

Schematic of sites within the molecule that may be sites of metabolic alteration.

## Supplemental Figure 2. Schematic of W-18 metabolism

W-18 undergoes extensive metabolism with mono- and di-hydroxylation, dealkylation and nitro-reduction. A).

Metabolite profile of W-18 incubated with MLM and heat

inactivated MLM (lower panel); MLM=mouse liver microsomes. B) W-18 metabolite

profile after incubation with HLM (upper) and heat-inactivated HLM. HLM=human liver

microsomes.

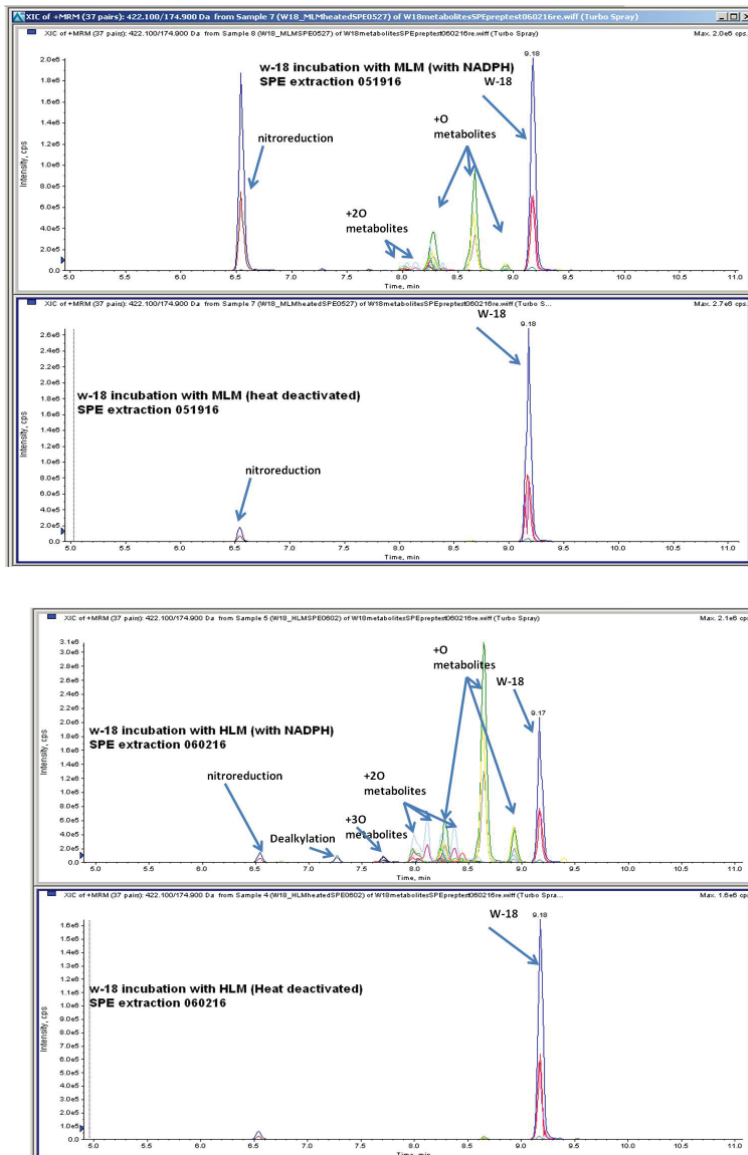

### Supplemental Figure 3. W18 metabolites profiling analysis.

A) W18 MLM incubations time points metabolites profiling analysis. B) W18 HLM incubations time points metabolites profiling analysis.

#### W-18 MLM incubations time points metabolites profiling analysis

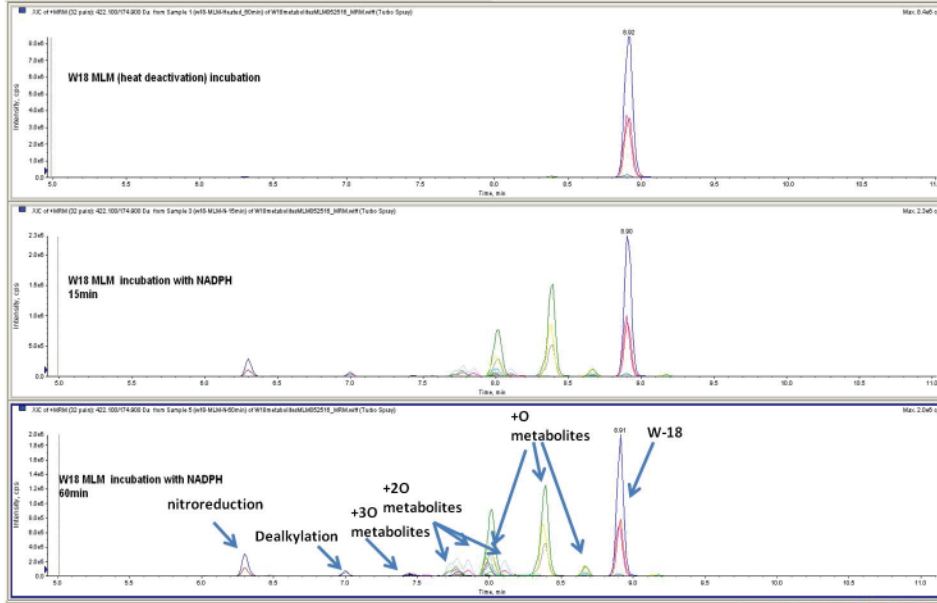

#### W-18 HLM incubations time points metabolites profiling analysis

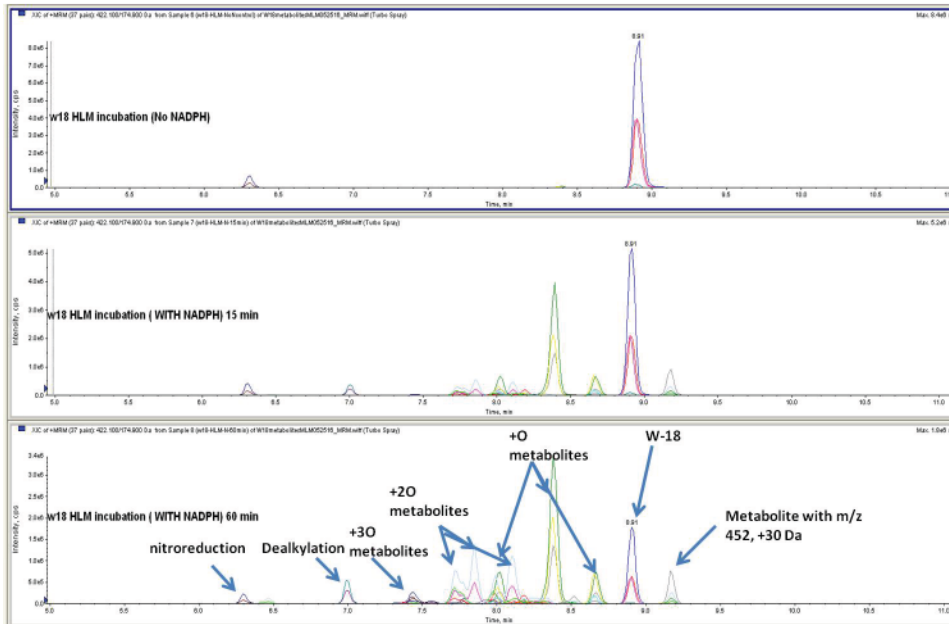

Supplement: jciinsight-2-97222-s001.pdf [file jciinsight-2-97222-s001.pdf]
